# Supplementary material for: Lack of Association between Postoperative Pancreatitis and Other Postoperative Complications Following Pancreaticoduodenectomy
Source: PubMed Central journal article supplement (PMC8001526; doi:10.3390/jcm10061179), 2021-03-11
Supplement: jcm-10-01179-s001.pdf [file jcm-10-01179-s001.pdf]

**Supplementary table 1. Univariable and multivariable analyses of total postoperative complication rate after backward elimination by forcing the inclusion of clinically relevant POAP**

| Variable                                   | Univariable                             |                      | Multivariable                           |                      |
|--------------------------------------------|-----------------------------------------|----------------------|-----------------------------------------|----------------------|
|                                            | Odds ratio<br>(95% confidence interval) | <i>P</i> value       | Odds ratio<br>(95% confidence interval) | <i>P</i> value       |
| Clinically relevant POAP                   | 0.888 (0.520-1.516)                     | 0.662                | 0.897 (0.517-1.555)                     | 0.697                |
| Age                                        | 1.015 (0.988-1.044)                     | 0.280                |                                         |                      |
| Sex                                        | 0.867 (0.518-1.453)                     | 0.589                |                                         |                      |
| BMI                                        | 0.954 (0.877-1.036)                     | 0.264                |                                         |                      |
| ASA score (Ref: I)                         |                                         | 0.151                |                                         | 0.141                |
|                                            | II                                      | 1.383 (0.617-3.159)  | 0.432                                   | 1.440 (0.637-3.318)  |
|                                            | III                                     | 3.125 (0.959-11.130) | 0.066                                   | 3.238 (0.988-11.597) |
| Preoperative CEA                           | 1.001 (1.000-1.002)                     | 0.163                |                                         |                      |
| Preoperative CA19-9                        | 0.999 (0.262-3.820)                     | 0.998                |                                         |                      |
| Preoperative biliary / pancreatic drainage | 0.883 (0.532-1.460)                     | 0.627                | 0.871 (0.518-1.462)                     | 0.602                |
| Preoperative cholangitis                   | 0.891 (0.480-1.657)                     | 0.715                |                                         |                      |
| ERAS group                                 | 0.907 (0.549-1.497)                     | 0.701                |                                         |                      |
| Preoperative pancreatic duct size          | 0.982 (0.866-1.112)                     | 0.771                |                                         |                      |
| Pancreatic texture                         | 0.806 (0.468-1.382)                     | 0.435                |                                         |                      |
| Pancreaticojejunostomy method              | 1.358 (0.591-3.246)                     | 0.477                |                                         |                      |
| Tumor location (Ref: Pancreas)             |                                         | 0.718                |                                         |                      |
|                                            | Ampulla of Vater                        | 0.686 (0.332-1.400)  | 0.302                                   |                      |
|                                            | Distal common bile duct                 | 1.034 (0.570-1.884)  | 0.913                                   |                      |
|                                            | Duodenum                                | 1.118 (0.367-3.572)  | 0.845                                   |                      |
| Cancer                                     | 1.001 (0.560-1.783)                     | 0.996                |                                         |                      |
| Resection margin status                    | 1.484 (0.601-3.881)                     | 0.400                |                                         |                      |

**Supplementary table 2. Univariable and multivariable analyses of severe complications (Clavien-Dindo  $\geq$  IIIa) rate after backward elimination by forcing the inclusion of clinically relevant POAP**

| Variable                                   | Univariable                             |                     | Multivariable                           |                |
|--------------------------------------------|-----------------------------------------|---------------------|-----------------------------------------|----------------|
|                                            | Odds ratio<br>(95% confidence interval) | <i>P</i> value      | Odds ratio<br>(95% confidence interval) | <i>P</i> value |
| Clinically relevant POAP                   | 0.788 (0.295-1.899)                     | 0.611               | 0.854 (0.306-2.182)                     | 0.750          |
| Age                                        | 1.034 (0.987-1.089)                     | 0.178               |                                         |                |
| Sex                                        | 0.477 (0.168-1.179)                     | 0.130               | 0.331 (0.104-0.939)                     | 0.046          |
| BMI                                        | 1.003 (0.872-1.146)                     | 0.971               |                                         |                |
| ASA score (Ref: I)                         |                                         | 0.044               |                                         |                |
|                                            | II                                      | NA*                 |                                         | 0.989          |
|                                            | III                                     | NA*                 |                                         | 0.990          |
| Preoperative CEA                           | 1.000 (0.998-1.002)                     | 0.866               |                                         |                |
| Preoperative CA19-9                        | 0.661 (0.066-5.778)                     | 0.717               | 0.205 (0.013-2.757)                     | 0.242          |
| Preoperative biliary / pancreatic drainage | 0.735 (0.317-1.692)                     | 0.467               | 0.601 (0.242-1.456)                     | 0.261          |
| Preoperative cholangitis                   | 0.705 (0.199-1.962)                     | 0.540               |                                         |                |
| ERAS group                                 | 1.569 (0.683-3.752)                     | 0.294               |                                         |                |
| Preoperative pancreatic duct size          | 1.018 (0.805-1.208)                     | 0.856               |                                         |                |
| Pancreaticojejunostomy method              | 1.233 (0.277-3.940)                     | 0.749               |                                         |                |
| Pancreatic texture                         | 0.811 (0.343-2.013)                     | 0.637               |                                         |                |
| Tumor location (Ref: Pancreas)             |                                         | 0.570               |                                         |                |
|                                            | Ampulla of Vater                        | 0.385 (0.059-1.453) |                                         | 0.220          |
|                                            | Distal common bile duct                 | 0.856 (0.312-2.148) |                                         | 0.748          |
|                                            | Duodenum                                | 0.564 (0.030-3.160) |                                         | 0.594          |
| Cancer                                     | 1.390 (0.534-4.330)                     | 0.529               |                                         |                |
| Resection margin status                    | 3.125 (0.945-8.976)                     | 0.043               | 3.507 (1.020-10.742)                    | 0.033          |

\* The results could not be calculated due to the existence of zero cells.

**Supplementary table 3. Univariable and multivariable analyses of CR-POPF rate after backward elimination by forcing the inclusion of clinically relevant POAP**

| Variable                                   | Univariable                             |                     | Multivariable                           |                |
|--------------------------------------------|-----------------------------------------|---------------------|-----------------------------------------|----------------|
|                                            | Odds ratio<br>(95% confidence interval) | <i>P</i> value      | Odds ratio<br>(95% confidence interval) | <i>P</i> value |
| Clinically relevant POAP                   | 0.785 (0.244-2.165)                     | 0.656               | 0.758 (0.216-2.364)                     | 0.644          |
| Age                                        | 1.064 (1.003-1.137)                     | 0.051               | 1.072 (1.006-1.152)                     | 0.043          |
| Sex                                        | 0.301 (0.068-0.944)                     | 0.063               | 0.268 (0.058-0.905)                     | 0.053          |
| BMI                                        | 1.017 (0.866-1.186)                     | 0.838               |                                         |                |
| ASA score (Ref: I)                         |                                         | 0.110               |                                         |                |
|                                            | II                                      | NA*                 |                                         | 0.990          |
|                                            | III                                     | NA*                 |                                         | 0.990          |
| Preoperative CEA                           | 1.002 (1.000-1.003)                     | 0.016               |                                         |                |
| Preoperative CA19-9                        | 4.822 (0.414-48.984)                    | 0.192               |                                         |                |
| Preoperative biliary / pancreatic drainage | 3.095 (1.073-11.175)                    | 0.052               |                                         |                |
| Preoperative cholangitis                   | 0.750 (0.169-2.388)                     | 0.660               | 0.384 (0.078-1.367)                     | 0.178          |
| ERAS group                                 | 0.359 (0.112-0.985)                     | 0.059               | 0.364 (0.106-1.082)                     | 0.082          |
| Preoperative pancreatic duct size          | 0.832 (0.555-1.099)                     | 0.298               |                                         |                |
| Pancreaticojejunostomy method              | 1.114 (0.169-4.260)                     | 0.890               |                                         |                |
| Pancreatic texture                         | 0.993 (0.370-2.949)                     | 0.990               |                                         |                |
| Tumor location (Ref: Pancreas)             |                                         | 0.011               |                                         |                |
|                                            | Ampulla of Vater                        | 1.263 (0.176-6.125) |                                         | 0.785          |
|                                            | Distal common bile duct                 | 4.714 (1.633-15.56) |                                         | 0.006          |
|                                            | Duodenum                                | NA*                 |                                         | 0.989          |
| Cancer                                     | 1.746 (0.552-7.726)                     | 0.392               |                                         |                |
| Resection margin status                    | 3.462 (0.906-10.956)                    | 0.045               | 2.995 (0.704-11.121)                    | 0.111          |

\* The results could not be calculated due to the existence of zero cells.

**Supplementary table 4. Univariable and multivariable analyses of total postoperative complication rate after backward elimination by forcing the inclusion of clinically relevant POAP after excluding patients with high preoperative amylase levels**

| Variable                                   | Univariable                             |                      | Multivariable                           |                |
|--------------------------------------------|-----------------------------------------|----------------------|-----------------------------------------|----------------|
|                                            | Odds ratio<br>(95% confidence interval) | <i>P</i> value       | Odds ratio<br>(95% confidence interval) | <i>P</i> value |
| Clinically relevant POAP                   | 0.595 (0.504-1.481)                     | 0.595                | 0.875 (0.502-1.523)                     | 0.653          |
| Age                                        | 1.016 (0.988-1.044)                     | 0.275                |                                         |                |
| Sex                                        | 0.847 (0.504-1.423)                     | 0.531                |                                         |                |
| BMI                                        | 0.961 (0.884-1.044)                     | 0.352                |                                         |                |
| ASA score (Ref: I)                         |                                         | 0.149                |                                         | 0.138          |
|                                            | II                                      | 1.371 (0.611-3.134)  | 1.434 (0.634-3.308)                     | 0.388          |
|                                            | III                                     | 3.125 (0.959-11.130) | 3.254 (0.993-11.657)                    | 0.058          |
| Preoperative CEA                           | 1.001 (1.000-1.002)                     | 0.200                |                                         |                |
| Preoperative CA19-9                        | 1.015 (0.265-3.897)                     | 0.983                |                                         |                |
| Preoperative biliary / pancreatic drainage | 0.871 (0.524-1.444)                     | 0.593                | 0.863 (0.511-1.451)                     | 0.578          |
| Preoperative cholangitis                   | 0.899 (0.483-1.672)                     | 0.735                |                                         |                |
| ERAS group                                 | 0.890 (0.537-1.473)                     | 0.650                |                                         |                |
| Preoperative pancreatic duct size          | 0.982 (0.866-1.112)                     | 0.768                |                                         |                |
| Pancreatic texture                         | 0.818 (0.471-1.411)                     | 0.472                |                                         |                |
| Pancreaticojejunostomy method              | 1.266 (0.543-3.054)                     | 0.588                |                                         |                |
| Tumor location (Ref: Pancreas)             |                                         | 0.731                |                                         |                |
|                                            | Ampulla of Vater                        | 0.684 (0.331-1.398)  | 0.299                                   |                |
|                                            | Distal common bile duct                 | 1.003 (0.550-1.834)  | 0.992                                   |                |
|                                            | Duodenum                                | 1.114 (0.366-3.565)  | 0.849                                   |                |
| Cancer                                     | 0.993 (0.555-1.769)                     | 0.980                |                                         |                |
| Resection margin status                    | 1.579 (0.611-4.383)                     | 0.356                |                                         |                |

**Supplementary table 5. Univariable and multivariable analyses of severe complications (Clavien-Dindo  $\geq$  IIIa) after backward elimination by forcing the inclusion of clinically relevant POAP after excluding patients with high preoperative amylase levels**

| Variable                                   | Univariable                             |                     | Multivariable                           |                |
|--------------------------------------------|-----------------------------------------|---------------------|-----------------------------------------|----------------|
|                                            | Odds ratio<br>(95% Confidence interval) | <i>P</i> value      | Odds ratio<br>(95% Confidence interval) | <i>P</i> value |
| Clinically relevant POAP                   | 0.789 (0.295-1.900)                     | 0.612               | 0.819 (0.295-2.067)                     | 0.684          |
| Age                                        | 1.034 (0.987-1.089)                     | 0.180               | 1.036 (0.985-1.096)                     | 0.187          |
| Sex                                        | 0.475 (0.168-1.175)                     | 0.128               | 0.419 (0.144-1.058)                     | 0.081          |
| BMI                                        | 1.002 (0.872-1.146)                     | 0.974               |                                         |                |
| ASA score (Ref: I)                         |                                         | 0.042               |                                         |                |
|                                            | II                                      | NA*                 |                                         | 0.989          |
|                                            | III                                     | NA*                 |                                         | 0.990          |
| Preoperative CEA                           | 1.000 (0.998-1.002)                     | 0.822               |                                         |                |
| Preoperative CA19-9                        | 0.655 (0.066-5.703)                     | 0.710               |                                         |                |
| Preoperative biliary / pancreatic drainage | 0.754 (0.325-1.735)                     | 0.504               | 0.594 (0.238-1.447)                     | 0.253          |
| Preoperative cholangitis                   | 0.693 (0.195-1.929)                     | 0.520               |                                         |                |
| ERAS group                                 | 1.556 (0.677-3.722)                     | 0.304               |                                         |                |
| Preoperative pancreatic duct size          | 1.017 (0.805-1.207)                     | 0.862               |                                         |                |
| Pancreaticojejunostomy method              | 0.776 (0.328-1.930)                     | 0.571               |                                         |                |
| Pancreatic texture                         | 1.279 (0.286-4.104)                     | 0.708               |                                         |                |
| Tumor location (Ref: Pancreas)             |                                         | 0.552               |                                         |                |
|                                            | Ampulla of Vater                        | 0.379 (0.058-1.427) |                                         | 0.211          |
|                                            | Distal common bile duct                 | 0.854 (0.311-2.147) |                                         | 0.746          |
|                                            | Duodenum                                | 0.554 (0.029-3.103) |                                         | 0.582          |
| Cancer                                     | 1.416 (0.544-4.411)                     | 0.506               |                                         |                |
| Resection margin status                    | 3.554 (1.062-10.413)                    | 0.026               | 3.999 (1.144-12.558)                    | 0.021          |

\* The results could not be calculated due to the existence of zero cells.

**Supplementary table 6. Univariable and multivariable analyses of CR-POPF after backward elimination by forcing the inclusion of clinically relevant POAP after excluding patients with high preoperative amylase levels**

| Variable                                   | Univariable                             |                      | Multivariable                           |                |
|--------------------------------------------|-----------------------------------------|----------------------|-----------------------------------------|----------------|
|                                            | Odds ratio<br>(95% confidence interval) | <i>P</i> value       | Odds ratio<br>(95% confidence interval) | <i>P</i> value |
| Clinically relevant POAP                   | 0.785 (0.244-2.167)                     | 0.657                | 0.667 (0.184-2.135)                     | 0.510          |
| Age                                        | 1.064 (1.003-1.137)                     | 0.051                | 1.082 (1.010-1.170)                     | 0.035          |
| Sex                                        | 0.300 (0.068-0.941)                     | 0.063                | 0.198 (0.040-0.710)                     | 0.023          |
| BMI                                        | 1.016 (0.865-1.186)                     | 0.839                | 1.171 (0.961-1.432)                     | 0.116          |
| ASA score (Ref: I)                         |                                         | 0.108                |                                         |                |
|                                            | II                                      | NA*                  |                                         | 0.990          |
|                                            | III                                     | NA*                  |                                         | 0.990          |
| Preoperative CEA                           | 1.002 (1.000-1.003)                     | 0.014                |                                         |                |
| Preoperative CA19-9                        | 4.744 (0.409-48.042)                    | 0.195                |                                         |                |
| Preoperative biliary / pancreatic drainage | 3.174 (1.099-11.462)                    | 0.047                |                                         |                |
| Preoperative cholangitis                   | 0.738 (0.166-2.349)                     | 0.641                | 0.317 (0.060-1.191)                     | 0.123          |
| ERAS group                                 | 0.355 (0.111-0.976)                     | 0.056                | 0.309 (0.083-0.967)                     | 0.056          |
| Preoperative pancreatic duct size          | 0.833 (0.557-1.099)                     | 0.298                |                                         |                |
| Pancreaticojejunostomy method              | 0.953 (0.355-2.832)                     | 0.926                |                                         |                |
| Pancreatic texture                         | 1.153 (0.175-4.425)                     | 0.855                |                                         |                |
| Tumor location (Ref: Pancreas)             |                                         | 0.011                |                                         |                |
|                                            | Ampulla of Vater                        | 1.242 (0.173-6.024)  |                                         | 0.800          |
|                                            | Distal common bile duct                 | 4.720 (1.633-15.590) |                                         | 0.006          |
|                                            | Duodenum                                | NA*                  |                                         | 0.989          |
| Cancer                                     | 1.777 (0.562-7.867)                     | 0.377                |                                         |                |
| Resection margin status                    | 3.905 (1.013-12.553)                    | 0.030                | 4.821 (1.044-20.618)                    | 0.034          |

\* The results could not be calculated due to the existence of zero cells.
